# Supplementary material for: An integrated process for enzymatic catalysis allowing product recovery and enzyme reuse by applying thermoreversible aqueous biphasic systems
Source: Royal Society of Chemistry journal article supplement (doi:10.1039/c7gc03880a), 2018-01-01
Supplement: c7gc03880a1.pdf [file c7gc03880a1.pdf]

# Electronic Supplementary Information

## An integrated process for enzymatic catalysis allowing product recovery and enzyme reuse by applying thermoreversible aqueous biphasic systems

Ana M. Ferreira,<sup>†a</sup> Helena Passos,<sup>†a</sup> Akiyoshi Okafuji,<sup>b</sup> Ana P. M.  
Tavares,<sup>a</sup> Hiroyuki Ohno,<sup>b</sup> Mara G. Freire<sup>\*a</sup> and João A. P. Coutinho<sup>\*a</sup>

<sup>a</sup>*CICECO – Aveiro Institute of Materials, Chemistry Department, University of Aveiro,  
3810-193 Aveiro, Aveiro, Portugal.*

<sup>b</sup>*Department of Biotechnology and Life Science, Tokyo University of Agriculture and  
Technology, 2-24-16, Nakacho, Koganei, Tokyo 184-8588, Japan.*

<sup>†</sup>Authors contributed equally to the work.

\*E-mail: maragfreire@ua.pt; jcoutinho@ua.pt.

## 1. Materials

The reagents used in the zwitterions (ZIs) synthesis were 1,3-propanesultone ( $\geq 99$  wt % pure), triamylamine ( $\geq 98$  wt % pure), tripropylamine ( $\geq 98$  wt % pure) and trimethylamine (*ca.* 13 % v/v in acetonitrile) from Tokyo Chemical Industry Co. The following organic solvents, purchased from Kanto Chemical Co., Inc, were also used: acetonitrile ( $\geq 99.5$  wt % pure), diethyl ether ( $\geq 99$  wt % pure), ethyl acetate ( $\geq 99.5$  wt % pure), hexane ( $\geq 96$  wt % pure) and methanol ( $\geq 99.8$  wt % pure). Deuterium oxide, D<sub>2</sub>O (99.8 atom % D) from ACROS Organics was used in nuclear magnetic resonance (NMR) experiments.

To prepare aqueous biphasic systems (ABS), polyethylene glycol (PEG) with different molecular weights, namely 1540, 2000, 4000 and 6000 g/mol (abbreviated as PEG 1540, PEG 2000, PEG 4000 and PEG 6000, respectively) were used. They were obtained from Wako Pure Chemical Industries, Ltd, with the exception of PEG 2000 that was obtained from Kanto Chemical Co., Inc.

All studies were performed using commercial laccase from *Trametes versicolor* and 2,2'-azino-bis(3-ethylbenzothiazoline-6-sulfonic acid (ABTS), acquired from Sigma. The salts used were C<sub>6</sub>H<sub>8</sub>O<sub>7</sub>·H<sub>2</sub>O (> 99%) from Fisher Scientific, and Na<sub>2</sub>HPO<sub>4</sub> (> 99%) from Merck.

## 2. Experimental Procedure

**Determination of the ABS phase diagrams and tie-line.** The binodal curves were determined through the cloud point titration method, previously described by us,<sup>1</sup> at 25, 35, and 45 °C ( $\pm 1$  °C) and atmospheric pressure. Aqueous solutions of polymer at 50-70 wt % and aqueous solutions of each ZI with concentrations ranging from 50 to 70 wt % were prepared and used. Repetitive drop wise addition of the aqueous polymer solution to the aqueous solution of ZI was carried out under constant stirring until the detection of a cloudy solution, followed by the drop wise addition of ultrapure water until the finding of a clear and limpid solution. Whenever necessary, and to better characterize the solubility curves, the addition of the ZI aqueous solution to the polymer aqueous solution also was carried out. The ternary system compositions were determined by weight quantification within  $\pm 10^{-3}$  g.

Tie-line (TLs) were determined by a gravimetric method originally described by Merchuk *et al.*<sup>2</sup>. A mixture at the biphasic region was gravimetrically prepared (PEG + ZI+ water) within  $\pm 10^{-4}$  g, vigorously stirred, and left for at least 12 h at the desired temperature to reach the complete separation and equilibration of the coexisting phases. After the separation step, both top and bottom phases were weighted.

The experimental binodal curves were fitted using Equation (1)<sup>2</sup>:

$$[PEG] = A \exp[(B[ZI]^{0.5}) - (C[ZI]^3)] \quad (1)$$

where  $[PEG]$  and  $[ZI]$  are the PEG and ZI weight percentages, respectively, and  $A$ ,  $B$  and  $C$  are constants obtained by the regression.

**Oxidation reaction and separation of laccase.** The following mixtures compositions were used to carry out the enzymatic catalysis: 39 wt% of N<sub>555</sub>C3S + 13 wt% of PEG 6000 and 20 wt% of N<sub>111</sub>C3S + 20 wt% of PEG 6000. The oxidation reaction in aqueous PEG/ZI monophasic systems was investigated using laccase solutions prepared with a concentration circa 10 g·L<sup>-1</sup> dissolved in PBS (phosphate buffered saline at 0.01M and pH ≈ 7.4 at 25 °C), as well as aqueous solutions of ABTS with a concentration of 0.8 g·L<sup>-1</sup> dissolved in PBS. In each system, a small amount of the solution containing laccase (≈ 250 μL) and a small amount of the solution containing ABTS (≈ 50 μL) were added to the phase-forming components to reach a total weight of 1 g. The oxidative reactions were carried out at 45 °C and 25 °C in N<sub>555</sub>C3S- and N<sub>111</sub>C3S-based ABS, respectively. Each mixture was carefully mixed during 1 min. Then, the reaction systems were cooled down to 25 °C or heated up to 45 °C in N<sub>555</sub>C3S- and N<sub>111</sub>C3S-based ABS, respectively. A careful separation of both phases was then performed. The quantification of oxidized ABTS was carried by UV-spectroscopy, using a UV-Vis spectrophotometer, at a wavelength of 420 nm, in each phase. Laccase was quantified by its activity, for which 10 μL of each phase was mixed with 50 μL of ABTS, and 700 μL of citrate/phosphate buffer (0.1M) at pH 4.5. The increase in absorbance/min was recorded in a UV-Vis spectrophotometer at 420 nm. Each procedure has been repeated at least three times to determine the average in the compounds extraction efficiencies, as well as the respective standard deviations. Possible interferences of the ZI and polymer with the analytical method were taken into account, and control samples were always prepared using PBS solutions instead of laccase and ABTS aqueous solutions. The percentage extraction efficiency of oxidase ABTS ( $EE_{ABTS}\%$ ) and laccase ( $EE_{laccase}\%$ ) are defined as the percentage ratio between the amount of oxidase ABTS/active laccase in the ZI-rich aqueous phase or PEG-rich phase and that in the total mixture. The ZI interference or the bottom-phase interference in the laccase activity was also evaluated by preparing 5 mixtures, all of them with 50 μL of a laccase solution, and 37 μL of PBS, ZI or bottom-rich phase. The laccase activity was determined in each mixture.

**Recovery and activity of laccase.** To investigate the recovery and stability of laccase, five consecutive cycles of oxidative reaction of ABTS were performed. Each cycle (reaction + separation) was carried out in a maximum of 1 h. The laccase activity was assayed as previously described. After the reaction, the formation of ABS was induced by changes in temperature. The upper phase was removed (substrate-rich phase), and a fresh substrate solution was added (same volume of solution removed with a composition determined by the TL), and a new cycle started. The 5 cycles were carried out in a maximum of 5 h. The operational stability along the cycles was evaluated by the relative enzyme activity. The relative laccase activity (%) is defined as the ratio of the enzyme activity at the end of each cycle in respect to the enzyme activity in the first cycle.

**Recovery of PEG.** An ultrafiltration step was applied to the PEG-rich phase using amicons with a cut-off 3 kDa. 2 cycles at 10000 rpm, 20 min each, were applied. The phases obtained were analysed by FTIR and UV-Vis spectroscopies to address the presence of polymer, ZI and ABTS.

### 3. Results

#### **Zwitterions**

$N_{555}C_{3S}$ :  $\delta_H$  (400 MHz;  $D_2O$ ;  $\delta$ /ppm relative to TMS): 0.77 (9H, t,  $J=7.00$ ), 1.22 (12H), 1.52 (6H), 2.01 (2H), 2.83 (2H, t,  $J=7.00$ ), 3.10 (6H), 3.25 (2H). Elemental analysis (%) for  $C_{18}H_{39}NO_3S$ : Found: C, 61.37; H, 11.67; N, 3.76; C/N, 16.32. Calculated: C, 61.85; H, 11.25; N, 4.01; C/N, 15.42.

$N_{333}C_{3S}$ :  $\delta_H$  (400 MHz;  $D_2O$ ;  $\delta$ /ppm relative to TMS): 0.83 (9H, t,  $J=7.30$ ), 1.55 (6H), 1.98 (2H), 2.83 (2H, t,  $J=7.00$ ), 3.06 (6H), 3.26 (2H). Elemental analysis (%) for  $C_{12}H_{27}NO_3S$ : Found: C, 53.22; H, 10.50; N, 44.89; C/N, 10.89. Calculated: C, 54.31; H, 10.25; N, 45.28; C/N, 10.29.

$N_{111}C_{3S}$ :  $\delta_H$  (400 MHz;  $D_2O$ ;  $\delta$ /ppm relative to TMS): 2.12 (2H), 2.86 (2H, t,  $J=7.30$ ), 3.03 (9H), 3.37 (2H). Elemental analysis (%) for  $C_6H_{15}NO_3S$ : Found: C, 39.60; H, 8.51; N, 7.38; C/N, 5.36. Calculated: C, 39.76; H, 8.34; N, 7.73; C/N, 5.14.

**Determination of the ABS phase diagrams and tie-line**

**Table S1.** Experimental weight fraction data for the systems composed of PEG (1) + N<sub>111</sub>C3S (2) + H<sub>2</sub>O (3) at 25 °C and atmospheric pressure.

| PEG 1540           |                    | PEG 2000           |                    | PEG 4000           |                    | PEG 6000           |                    |
|--------------------|--------------------|--------------------|--------------------|--------------------|--------------------|--------------------|--------------------|
| 100 w <sub>1</sub> | 100 w <sub>2</sub> |
| 61.7421            | 6.0918             | 34.0487            | 18.7480            | 4.5019             | 39.9471            | 36.5480            | 13.8659            |
| 55.4399            | 8.5957             | 31.8726            | 20.3877            | 38.5272            | 14.1616            | 31.6993            | 16.3996            |
| 48.1452            | 12.2903            | 30.3512            | 21.6191            | 33.8958            | 17.2392            | 28.1107            | 17.9649            |
| 42.1343            | 15.3750            | 28.3233            | 22.1655            | 30.0458            | 19.7265            | 26.1921            | 18.7581            |
| 34.7956            | 20.4897            | 25.5365            | 24.1730            | 28.0121            | 20.6579            | 23.8267            | 20.0611            |
| 28.1009            | 25.5694            | 23.2277            | 25.7972            | 25.4302            | 22.5751            | 20.3927            | 21.5968            |
| 23.3294            | 29.1927            | 21.4455            | 26.7825            | 23.1789            | 24.0596            | 18.6645            | 22.8338            |
| 19.9088            | 31.9590            | 19.3712            | 28.6400            | 20.7934            | 25.9579            | 17.0672            | 24.0653            |
| 16.9317            | 33.9948            | 18.0385            | 29.5860            |                    |                    | 15.8596            | 24.9044            |
| 3.6458             | 51.5846            | 16.7994            | 30.6240            |                    |                    | 15.3595            | 25.2720            |
| 13.7774            | 37.1920            | 16.1899            | 30.8026            |                    |                    | 14.4565            | 25.8687            |
| 20.6973            | 31.1082            | 15.1847            | 31.4162            |                    |                    | 13.6024            | 26.3826            |
| 25.9894            | 26.6601            | 14.4760            | 32.2904            |                    |                    | 12.9157            | 26.7802            |
| 32.2135            | 21.7758            | 13.4289            | 33.2900            |                    |                    | 12.1127            | 27.4744            |
| 38.6463            | 17.1432            | 13.0566            | 33.4685            |                    |                    | 11.5231            | 27.9370            |
| 45.5854            | 12.8555            | 12.7045            | 33.6969            |                    |                    | 10.9030            | 28.6900            |
|                    |                    | 11.8409            | 34.5139            |                    |                    | 10.2791            | 29.3006            |
|                    |                    | 11.5821            | 34.7636            |                    |                    | 9.8782             | 29.5406            |
|                    |                    | 11.2841            | 34.9267            |                    |                    | 9.4401             | 29.9541            |
|                    |                    | 11.0058            | 34.9162            |                    |                    | 8.9751             | 30.3724            |
|                    |                    | 10.7818            | 35.0899            |                    |                    | 8.6531             | 30.5118            |
|                    |                    | 10.5888            | 35.2309            |                    |                    | 8.3425             | 30.7703            |
|                    |                    | 10.2064            | 35.7282            |                    |                    | 7.9672             | 31.1481            |
|                    |                    | 9.8278             | 36.1299            |                    |                    | 7.6797             | 31.3330            |
|                    |                    | 9.4236             | 36.3663            |                    |                    | 7.3563             | 31.5805            |
|                    |                    | 9.1261             | 36.6079            |                    |                    | 7.0926             | 31.7867            |
|                    |                    | 8.7886             | 36.8812            |                    |                    | 6.8398             | 32.0830            |
|                    |                    | 8.5036             | 37.1197            |                    |                    | 6.6460             | 32.1985            |
|                    |                    | 8.2073             | 37.3645            |                    |                    | 6.5345             | 32.1756            |
|                    |                    | 7.7852             | 38.0516            |                    |                    | 5.1742             | 33.3822            |
|                    |                    | 7.4631             | 38.4183            |                    |                    | 5.0224             | 33.4928            |
|                    |                    | 7.2257             | 38.5334            |                    |                    | 4.8670             | 33.6513            |
|                    |                    | 6.9512             | 38.9100            |                    |                    | 4.7271             | 33.8350            |
|                    |                    | 6.7573             | 39.0754            |                    |                    | 4.5967             | 34.0021            |
|                    |                    | 6.6478             | 39.0029            |                    |                    | 4.4796             | 34.0722            |
|                    |                    |                    |                    |                    |                    | 4.3459             | 34.2717            |

**Table S2.** Experimental weight fraction data for the systems composed of PEG (1) + N<sub>555</sub>C3S (2) + H<sub>2</sub>O (3) at 25 °C and atmospheric pressure.

| PEG 2000  |           | PEG 4000  |           | PEG 6000  |           |
|-----------|-----------|-----------|-----------|-----------|-----------|
| 100 $w_1$ | 100 $w_2$ | 100 $w_1$ | 100 $w_2$ | 100 $w_1$ | 100 $w_2$ |
| 22.2531   | 38.6759   | 31.8241   | 25.8809   | 36.5072   | 18.5734   |
| 17.8769   | 42.2702   | 29.4176   | 26.9142   | 33.7211   | 19.3230   |
| 13.2438   | 46.1743   | 27.4069   | 27.9340   | 30.8400   | 20.6449   |
|           |           | 24.9894   | 29.1468   | 28.0395   | 22.3740   |
|           |           | 22.5272   | 31.2166   | 26.0183   | 23.1997   |
|           |           | 20.8345   | 32.6053   | 24.3382   | 23.9173   |
|           |           | 18.2265   | 35.5452   | 22.0932   | 25.7930   |
|           |           |           |           | 20.5848   | 26.9534   |
|           |           |           |           | 18.9978   | 28.2837   |
|           |           |           |           | 17.6259   | 29.4506   |
|           |           |           |           | 16.3132   | 30.7081   |
|           |           |           |           | 15.2276   | 31.8042   |
|           |           |           |           | 14.1827   | 33.0016   |
|           |           |           |           | 13.3341   | 34.1333   |
|           |           |           |           | 12.3330   | 35.5667   |
|           |           |           |           | 11.5755   | 36.5125   |
|           |           |           |           | 10.7007   | 37.9364   |
|           |           |           |           | 10.0149   | 38.8572   |
|           |           |           |           | 9.3636    | 39.7651   |
|           |           |           |           | 8.9328    | 40.3753   |
|           |           |           |           | 8.3697    | 41.2818   |
|           |           |           |           | 7.8662    | 42.0420   |
|           |           |           |           | 7.4306    | 42.8574   |
|           |           |           |           | 7.0137    | 43.5142   |
|           |           |           |           | 6.6308    | 44.1926   |
|           |           |           |           | 6.2891    | 44.8622   |

**Table S3.** Experimental weight fraction data for the systems composed of PEG (1) + N<sub>111</sub>C3S (2) + H<sub>2</sub>O (3) at 35 °C and 45 °C and atmospheric pressure.

| PEG 1540           |                    |                    |                    | PEG 2000           |                    |                    |                    |
|--------------------|--------------------|--------------------|--------------------|--------------------|--------------------|--------------------|--------------------|
| 35 °C              |                    | 45 °C              |                    | 35 °C              |                    | 45 °C              |                    |
| 100 w <sub>1</sub> | 100 w <sub>2</sub> |
| 2.5799             | 52.4192            | 12.3438            | 30.7170            | 37.8487            | 14.1892            | 2.7565             | 35.8610            |
| 4.6128             | 42.3991            | 20.0573            | 25.4501            | 29.3328            | 19.5811            | 6.2559             | 31.7276            |
| 6.1163             | 39.3528            | 24.8130            | 21.0591            | 22.8144            | 24.0034            | 41.1505            | 10.2282            |
| 9.1282             | 35.5950            | 28.1497            | 18.7405            | 20.3801            | 25.3364            | 37.0615            | 12.4077            |
| 14.0020            | 31.4270            | 29.1972            | 17.3232            | 18.1173            | 27.6502            | 34.0536            | 13.8191            |
| 20.6191            | 26.1840            | 33.3398            | 15.2324            | 14.7896            | 29.5112            | 31.2460            | 15.2157            |
| 21.4814            | 25.1298            | 36.0052            | 13.7126            | 12.8064            | 31.7178            | 29.1164            | 16.1726            |
| 29.4090            | 20.0588            | 38.0713            | 12.6729            | 11.3756            | 32.8514            | 26.9461            | 17.1540            |
| 34.6321            | 16.5671            | 38.9525            | 11.4103            | 10.0079            | 33.8398            | 25.2384            | 17.9872            |
| 40.6361            | 13.0729            | 39.8117            | 10.1940            | 9.2179             | 34.6020            | 18.9339            | 21.7057            |
|                    |                    | 45.3637            | 8.1480             | 7.2448             | 36.4122            | 17.5744            | 22.7771            |
|                    |                    |                    |                    | 6.3520             | 37.7940            | 16.6291            | 23.4499            |
|                    |                    |                    |                    | 5.8848             | 38.2306            | 15.0332            | 24.8597            |
|                    |                    |                    |                    | 5.6474             | 38.2865            | 14.2061            | 25.8340            |
|                    |                    |                    |                    | 5.4368             | 38.5683            | 13.7490            | 25.9092            |
|                    |                    |                    |                    | 4.9457             | 39.7139            |                    |                    |
|                    |                    |                    |                    | 4.7770             | 39.7568            |                    |                    |

**Table S4.** Experimental weight fraction data for the systems composed of PEG (1) + N<sub>111</sub>C3S (2) + H<sub>2</sub>O (3) at 35 °C and 45 °C and atmospheric pressure.

| PEG 4000           |                    |                    |                    | PEG 6000           |                    |                    |                    |
|--------------------|--------------------|--------------------|--------------------|--------------------|--------------------|--------------------|--------------------|
| 35 °C              |                    | 45 °C              |                    | 35 °C              |                    | 45 °C              |                    |
| 100 w <sub>1</sub> | 100 w <sub>2</sub> |
| 40.5840            | 11.8056            | 2.5259             | 34.7317            | 40.5129            | 11.4816            | 45.2757            | 5.7506             |
| 36.8467            | 13.8912            | 3.6572             | 31.4290            | 25.4078            | 16.5983            | 40.2826            | 8.0785             |
| 33.2146            | 15.9229            | 4.7655             | 29.7844            | 21.4521            | 18.0844            | 32.8029            | 10.6718            |
| 30.2343            | 17.6603            | 8.1131             | 26.8450            | 20.1425            | 18.8188            | 30.4045            | 11.9240            |
| 25.7113            | 20.0444            | 41.6749            | 9.5992             | 19.0414            | 19.3449            | 25.0506            | 13.9550            |
| 24.0681            | 21.2838            | 36.2602            | 11.0490            | 17.8234            | 19.9910            | 22.6949            | 14.7161            |
| 20.5196            | 23.8284            | 33.2506            | 12.7646            | 16.8645            | 20.6571            | 19.8310            | 15.9964            |
| 18.7608            | 24.7111            | 30.9704            | 14.1185            | 14.5630            | 22.1402            | 16.4714            | 17.8744            |
| 16.7048            | 25.7350            | 28.7147            | 15.0193            | 12.3231            | 23.2632            | 14.6027            | 19.3607            |
| 14.9147            | 27.0727            | 25.2678            | 16.8539            | 10.6804            | 24.5741            | 12.7138            | 20.6243            |
| 13.2412            | 28.2875            | 22.5188            | 18.7483            | 9.7350             | 25.2282            | 11.2953            | 21.4441            |
| 12.1310            | 29.1904            |                    |                    |                    |                    | 10.1615            | 22.1220            |
| 10.7508            | 29.8224            |                    |                    |                    |                    | 9.6225             | 22.6210            |
| 9.9066             | 31.2383            |                    |                    |                    |                    | 8.7220             | 23.1279            |
| 8.5305             | 32.7156            |                    |                    |                    |                    | 6.8447             | 23.9302            |
| 7.6329             | 33.4654            |                    |                    |                    |                    |                    |                    |

**Table S5.** Experimental weight fraction data for the systems composed of PEG 6000 (1) + N<sub>555</sub>C3S (2) + H<sub>2</sub>O (3) at 35 °C and atmospheric pressure.

| 35 °C              |                    |
|--------------------|--------------------|
| 100 w <sub>1</sub> | 100 w <sub>2</sub> |
| 30.8761            | 26.2935            |
| 28.1694            | 27.4792            |
| 16.4114            | 36.4320            |
| 12.4479            | 41.5483            |
| 10.2233            | 43.5569            |
| 7.8140             | 47.1157            |

**Table S6.** Identification of the ZI-PEG systems able (✓) or not able (✗) to form ABS at 25 °C.

| Polymer  | N | C3S | N <sub>333</sub> C3S | N <sub>111</sub> C3S |
|----------|---|-----|----------------------|----------------------|
| PEG 1540 | ✗ |     | ✗                    | ✓                    |
| PEG 2000 | ✓ |     | ✗                    | ✓                    |
| PEG 4000 | ✓ |     | ✗                    | ✓                    |
| PEG 6000 | ✓ |     | ✗                    | ✓                    |

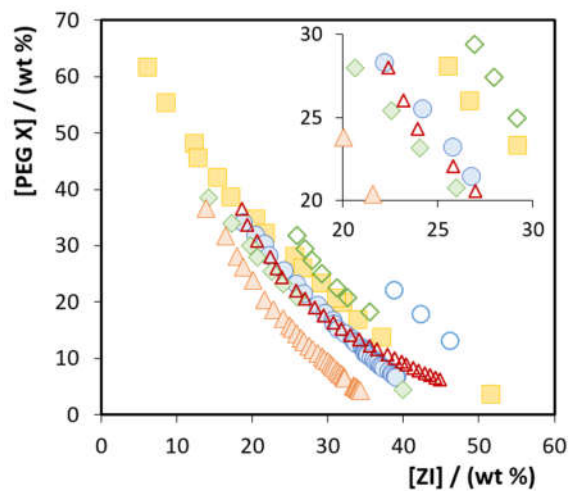

**Figure S1.** Ternary phase diagrams of ZI-PEG-based ABS at 25 °C. N<sub>111</sub>C3S (full symbols); N<sub>555</sub>C3S (open symbols): PEG 1540 (■), PEG 2000 (●), PEG 4000 (◆) and PEG 6000 (▲).



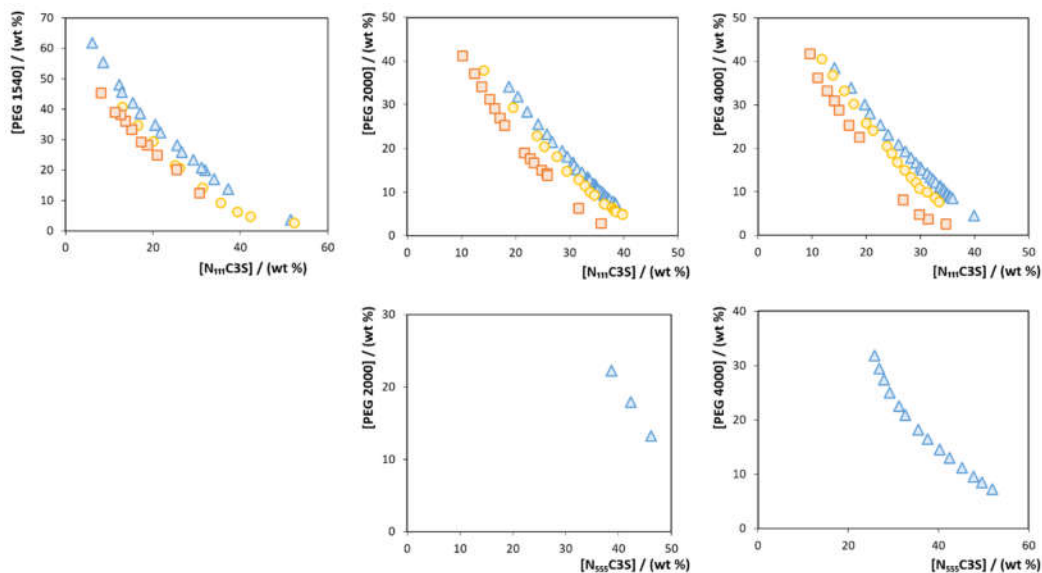

**Figure S2.** Temperature effect in the phase diagrams of ternary systems composed of ZI + water + PEG at 25 °C (▲), 35 °C (●), and 45 °C (■).

**Table S7.** Values for the constants  $A$ ,  $B$  and  $C$ , obtained by the regression of the experimental binodal data as described by Equation (1)<sup>2</sup>. Respective standard deviations,  $\sigma$ , and correlation coefficients,  $R^2$ , are also given. <sup>a</sup>Not determined due to insufficient experimental data to describe the binodal curve; <sup>b</sup>estimated.

| ZI                   | PEG             | T (°C)          | $A \pm \sigma$ | $B \pm \sigma$ | $10^6(C \pm \sigma)$ |
|----------------------|-----------------|-----------------|----------------|----------------|----------------------|
| N <sub>555</sub> C3S | 2000            | 25 <sup>a</sup> |                |                |                      |
|                      | 4000            | 25 <sup>a</sup> |                |                |                      |
|                      | 6000            | 25              | 333.8 ± 10.4   | -0.524 ± 0.004 | 0.48 ± 0.08          |
|                      |                 | 35              | 413.4 ± 13.5   | -0.488 ± 0.009 | 0.57 ± 0.13          |
|                      | 1540            | 25              | 110.5 ± 4.9    | -0.234 ± 0.014 | 1.23 ± 0.13          |
|                      |                 | 35              | 108.6 ± 32.4   | -0.259 ± 0.078 | 1.95 ± 0.48          |
| 45                   |                 | 85.1 ± 16.7     | -0.220 ± 0.060 | 2.32 ± 0.81    |                      |
| N <sub>111</sub> C3S | 2000            | 25              | 78.0 ± 1.3     | -0.154 ± 0.002 | 2.44 ± 0.05          |
|                      |                 | 35              | 84.0 ± 11.0    | -0.192 ± 0.033 | 2.61 ± 0.18          |
|                      |                 | 45              | 106.0 ± 19.6   | -0.281 ± 0.054 | 3.75 ± 0.62          |
|                      | 4000            | 25              | 81.3 ± 16.3    | -0.178 ± 0.053 | 2.72 ± 0.43          |
|                      |                 | 35              | 92.8 ± 12.0    | -0.225 ± 0.036 | 3.27 ± 0.30          |
|                      |                 | 45              | 94.2 ± 27.2    | -0.255 ± 0.088 | 5.67 ± 1.22          |
| 6000                 | 25              | 103.8 ± 1.2     | -0.269 ± 0.009 | 3.76 ± 0.14    |                      |
|                      | 35              | 253.3 ± 2.0     | -0.524 ± 0.011 | 3.85 ± 0.72    |                      |
|                      | 45              | 96.5 ± 2.0      | -0.302 ± 0.011 | 7.90 ± 0.72    |                      |
|                      | 40 <sup>b</sup> | 168.2 ± 0.6     | -0.434 ± 0.001 | 5.49 ± 0.04    |                      |

**Table S8.** Weight fraction percentage (wt %) composition of the initial mixture and of the coexisting phases of the ZI-based ABS used in the enzyme recovery, and pH value.

| ZI                   | PEG  | T (°C) | Weight fraction composition / wt % |                     |                    |                   |                     |                    |     |
|----------------------|------|--------|------------------------------------|---------------------|--------------------|-------------------|---------------------|--------------------|-----|
|                      |      |        | [PEG] <sub>PEG</sub>               | [ZI] <sub>PEG</sub> | [PEG] <sub>M</sub> | [ZI] <sub>M</sub> | [PEG] <sub>ZI</sub> | [ZI] <sub>ZI</sub> | pH  |
| N <sub>111</sub> C3S | 6000 | 40     | 30.4                               | 13.2                | 20.0               | 20.03             | 2.9                 | 30.9               | 4.6 |

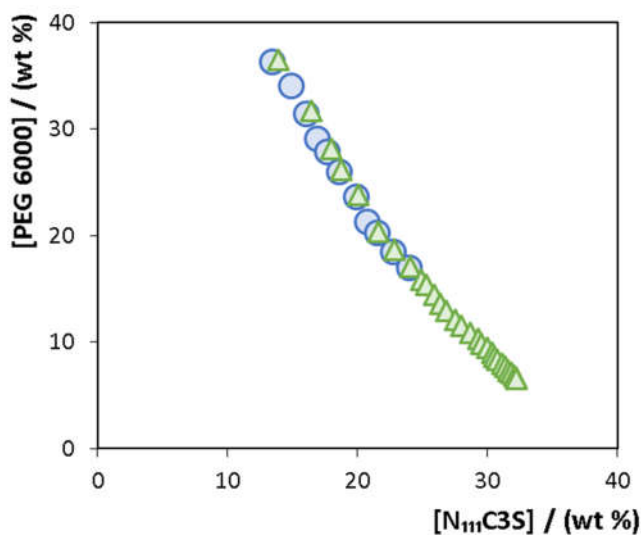

**Figure S2.** Ternary phase diagram of the N<sub>111</sub>C3S-PEG6000-based ABS at 25 °C: (▲) ABS composed of N<sub>111</sub>C3S, PEG 6000 and water; (●) ABS composed of N<sub>111</sub>C3S, PEG6000 and water, in presence of laccase, ABTS and PBS, at concentrations of 2.50 g/L, 4.00x10<sup>-2</sup> g/L and 4.83x10<sup>-4</sup> g/L, respectively.

#### ***Oxidation reaction and separation of Laccase***

**Table S9.** Extraction efficiencies (*EE* %) of the studied systems for oxidized ABTS and laccase for opposite phases in ZI-PEG-ABS.

|                      | <i>EE</i> <sub>ABTS</sub> (PEG-rich phase) % | <i>EE</i> <sub>laccase</sub> (ZI-rich phase) % |
|----------------------|----------------------------------------------|------------------------------------------------|
| N <sub>111</sub> C3S | 100                                          | 100                                            |
| N <sub>555</sub> C3S | 80.9 ± 4.0                                   | 85.0 ± 3.6                                     |

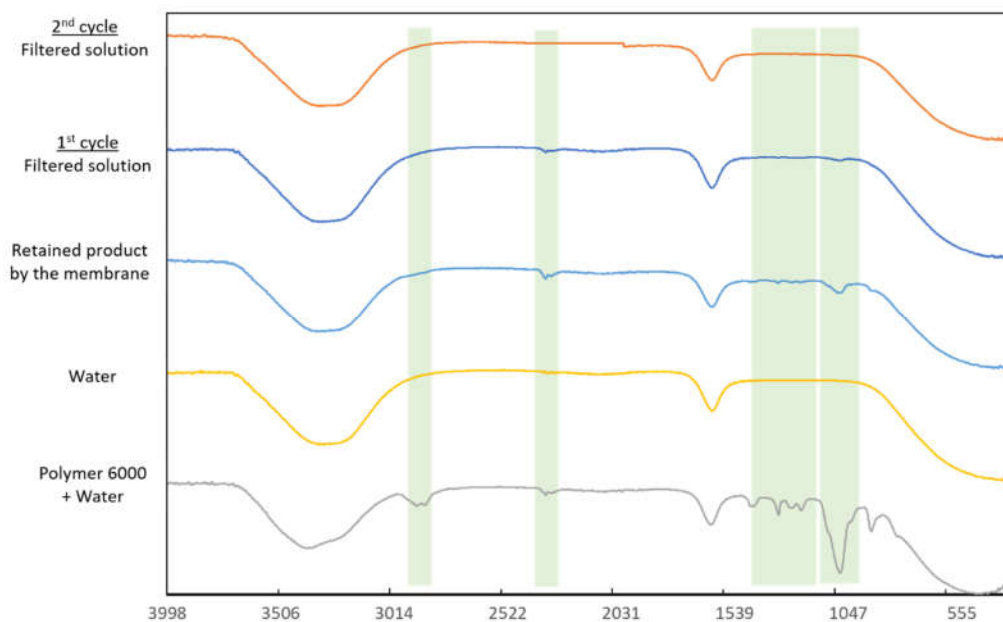

**Figure S3.** FT-IR (Fourier-transform infrared) spectroscopy spectra corresponding to the PEG-recovery assays.

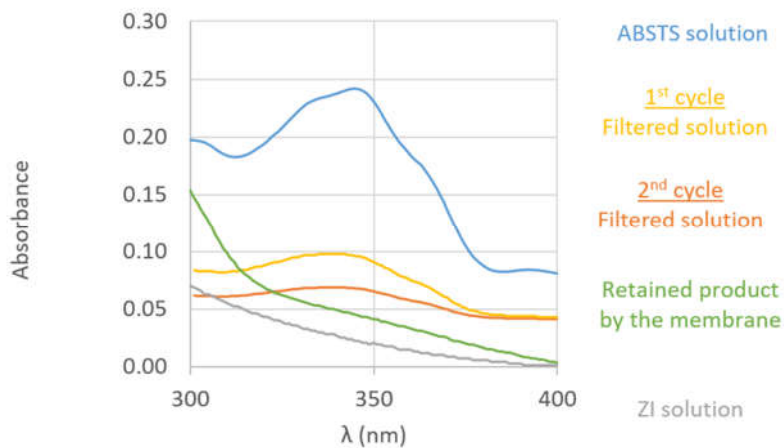

**Figure S4.** UV-Vis spectroscopy spectra corresponding to the PEG-recovery assays.

## References

1. M. G. Freire, A. F. M. Cláudio, J. M. M. Araújo, J. A. P. Coutinho, I. M. Marrucho, J. N. C. Lopes and L. P. N. Rebelo, *Chem. Soc. Rev.*, 2012, **41**, 4966–4995.
2. J. C. Merchuk, B. A. Andrews and J. A. Asenjo, *J Chromatogr B Biomed Sci Appl*, 1998, **711**, 285-293.
